# Supplementary material for: Association between dietary intake of saturated fatty acid subgroups and breast cancer risk
Source: Royal Society of Chemistry journal article supplement (doi:10.1039/d3fo04279k), 2024-01-01
Supplement: d3fo04279k1.pdf [file d3fo04279k1.pdf]

## **Association between dietary intake of saturated fatty acid subgroups and breast cancer risk**

Ying Jiang,<sup>a</sup> Lan-Ting Li,<sup>a</sup> Si-Han Hou,<sup>a</sup> Le-Ning Chen<sup>a</sup> and Cai-Xia Zhang<sup>\*a</sup>

<sup>a</sup> Guangdong Provincial Key Laboratory of Food, Nutrition and Health, Department of Epidemiology, School of Public Health, Sun Yat-sen University, Guangzhou 510080, PR China. E-mail: zhangcx3@mail.sysu.edu.cn. Tel: +86-20-87331943.

\* corresponding author

Supplemental Information including Supplemental Table 1-3

## Supplemental Information

**Supplemental Table 1** Distribution of individual saturated fatty acid intake between cases and controls

|                                                 | Cases (n=1661)         |                        |                        | Controls (n=1674)      |                        |                        | <i>P</i> <sub>value</sub> <sup>b</sup> |
|-------------------------------------------------|------------------------|------------------------|------------------------|------------------------|------------------------|------------------------|----------------------------------------|
|                                                 | <i>P</i> <sub>25</sub> | <i>P</i> <sub>50</sub> | <i>P</i> <sub>75</sub> | <i>P</i> <sub>25</sub> | <i>P</i> <sub>50</sub> | <i>P</i> <sub>75</sub> |                                        |
| Caproic acid (C6:0) (g/day) <sup>a</sup>        | 0.0002                 | 0.0027                 | 0.0136                 | 0.0002                 | 0.0041                 | 0.0203                 | 0.001                                  |
| Caprylic acid (C8:0) (g/day) <sup>a</sup>       | 0.0024                 | 0.0082                 | 0.0252                 | 0.0027                 | 0.0094                 | 0.0283                 | 0.094                                  |
| Capric acid (C10:0) (g/day) <sup>a</sup>        | 0.0084                 | 0.0215                 | 0.0558                 | 0.0092                 | 0.0257                 | 0.0746                 | <0.001                                 |
| Undecanoic acid (C11:0) (g/day) <sup>a</sup>    | 0.0005                 | 0.0008                 | 0.0015                 | 0.0005                 | 0.0009                 | 0.0017                 | <0.001                                 |
| Lauric acid (C12:0) (g/day) <sup>a</sup>        | 0.0732                 | 0.1406                 | 0.2508                 | 0.0740                 | 0.1475                 | 0.2750                 | 0.155                                  |
| Tridecanoic acid (C13:0) (g/day) <sup>a</sup>   | 0.0016                 | 0.0028                 | 0.0051                 | 0.0019                 | 0.0033                 | 0.0059                 | <0.001                                 |
| Myristic acid (C14:0) (g/day) <sup>a</sup>      | 0.3324                 | 0.5116                 | 0.7793                 | 0.3550                 | 0.5341                 | 0.8436                 | 0.002                                  |
| Pentadecanoic acid (C15:0) (g/day) <sup>a</sup> | 0.0402                 | 0.0665                 | 0.1148                 | 0.0467                 | 0.0802                 | 0.1283                 | <0.001                                 |
| Palmitic acid (C16:0) (g/day) <sup>a</sup>      | 4.8765                 | 6.7132                 | 9.0240                 | 5.0817                 | 6.7690                 | 8.9470                 | 0.462                                  |
| Heptadecanoic acid (C17:0) (g/day) <sup>a</sup> | 0.0608                 | 0.1004                 | 0.1740                 | 0.0654                 | 0.1059                 | 0.1813                 | 0.133                                  |
| Stearic acid (C18:0) (g/day) <sup>a</sup>       | 1.9158                 | 2.7226                 | 3.8220                 | 1.9460                 | 2.7185                 | 3.7482                 | 0.997                                  |
| Nonadecanoic acid (C19:0) (g/day) <sup>a</sup>  | 0.0055                 | 0.0085                 | 0.0128                 | 0.0062                 | 0.0095                 | 0.0136                 | <0.001                                 |
| Arachidic acid (C20:0) (g/day) <sup>a</sup>     | 0.0380                 | 0.0561                 | 0.0834                 | 0.0397                 | 0.0574                 | 0.0815                 | 0.452                                  |
| Behenic acid (C22:0) (g/day) <sup>a</sup>       | 0.0126                 | 0.0178                 | 0.0249                 | 0.0138                 | 0.0192                 | 0.0270                 | <0.001                                 |

<sup>a</sup> Dietary fatty acid intake was adjusted for total energy using the residual method.

<sup>b</sup> Wilcoxon rank-sum test was used for the comparison of dietary fatty acid intake by median between cases and controls.

## Supplemental Information

**Supplemental Table 2** Spearman correlations between individuals and subgroups of SFA intake and some food groups among controls ( $n=1674$ )

|                            | Cereals | Soybeans<br>and nuts | Vegetables | Fruits | Red meat<br>and<br>processed<br>meat | White<br>meat | Eggs   | Dairy<br>products |
|----------------------------|---------|----------------------|------------|--------|--------------------------------------|---------------|--------|-------------------|
| Caproic acid (C6:0)        | -0.05*  | 0.24**               | 0.15**     | 0.30** | -0.01                                | 0.14**        | 0.18** | 0.94**            |
| Caprylic acid (C8:0)       | -0.04   | 0.26**               | 0.15**     | 0.34** | 0.00                                 | 0.17**        | 0.22** | 0.86**            |
| Capric acid (C10:0)        | -0.06*  | 0.31**               | 0.18**     | 0.34** | 0.04                                 | 0.17**        | 0.20** | 0.92**            |
| Undecanoic acid (C11:0)    | -0.08** | 0.19**               | 0.08**     | 0.11** | 0.05*                                | 0.25**        | 0.85** | 0.22**            |
| Lauric acid (C12:0)        | 0.06*   | 0.23**               | 0.16**     | 0.32** | 0.17**                               | 0.19**        | 0.21** | 0.79**            |
| Tridecanoic acid (C13:0)   | -0.04   | 0.26**               | 0.26**     | 0.25** | 0.04                                 | 0.16**        | 0.61** | 0.69**            |
| Myristic acid (C14:0)      | -0.01   | 0.24**               | 0.17**     | 0.30** | 0.36**                               | 0.31**        | 0.33** | 0.76**            |
| Pentadecanoic acid (C15:0) | -0.08** | 0.28**               | 0.17**     | 0.28** | 0.09**                               | 0.30**        | 0.69** | 0.66**            |
| Palmitic acid (C16:0)      | 0.15**  | 0.24**               | 0.17**     | 0.18** | 0.68**                               | 0.35**        | 0.29** | 0.35**            |
| Heptadecanoic acid (C17:0) | 0.00    | 0.20**               | 0.10**     | 0.14** | 0.24**                               | 0.22**        | 0.83** | 0.28**            |
| Stearic acid (C18:0)       | 0.11**  | 0.20**               | 0.12**     | 0.15** | 0.72**                               | 0.30**        | 0.28** | 0.29**            |
| Nonadecanoic acid (C19:0)  | 0.04    | 0.33**               | 0.23**     | 0.27** | 0.15**                               | 0.58**        | 0.51** | 0.34**            |
| Arachidic acid (C20:0)     | 0.12**  | 0.28**               | 0.22**     | 0.24** | 0.36**                               | 0.50**        | 0.22** | 0.27**            |
| Behenic acid (C22:0)       | 0.07**  | 0.50**               | 0.48**     | 0.42** | 0.06*                                | 0.40**        | 0.28** | 0.47**            |
| Medium-chain SFAs          | 0.03    | 0.26**               | 0.16**     | 0.33** | 0.13**                               | 0.19**        | 0.22** | 0.86**            |
| Long even-chain SFAs       | 0.13**  | 0.23**               | 0.16**     | 0.19** | 0.68**                               | 0.34**        | 0.29** | 0.38**            |
| Long odd-chain SFAs        | -0.03   | 0.25**               | 0.15**     | 0.22** | 0.19**                               | 0.29**        | 0.80** | 0.49**            |
| Very long-chain SFAs       | 0.12**  | 0.35**               | 0.29**     | 0.30** | 0.32**                               | 0.50**        | 0.25** | 0.34**            |

\* Correlation coefficients were statistically significant for  $P < 0.05$ .

\*\* Correlation coefficients were statistically significant for  $P < 0.001$ .

## Supplemental Information

**Supplemental Table 3** Odds ratios (ORs) and 95% confidence intervals (95% CIs) of breast cancer according to quartiles of individual saturated fatty acid intake

|                                     | Q1      | Q2               | Q3               | Q4               | $P_{\text{trend}}^b$ |
|-------------------------------------|---------|------------------|------------------|------------------|----------------------|
| <b>Caproic acid (C6:0)</b>          |         |                  |                  |                  |                      |
| Cases/Controls                      | 430/418 | 513/419          | 392/419          | 326/418          |                      |
| Crude OR (95% CI)                   | 1       | 1.19 (0.99-1.43) | 0.91 (0.75-1.10) | 0.76 (0.62-0.92) | 0.001                |
| Adjusted OR 2 (95% CI) <sup>a</sup> | 1       | 1.16 (0.95-1.43) | 0.89 (0.72-1.11) | 0.72 (0.57-0.90) | 0.001                |
| <b>Caprylic acid (C8:0)</b>         |         |                  |                  |                  |                      |
| Cases/Controls                      | 450/418 | 427/419          | 416/419          | 368/418          |                      |
| Crude OR (95% CI)                   | 1       | 0.95 (0.78-1.14) | 0.92 (0.76-1.12) | 0.82 (0.67-0.99) | 0.045                |
| Adjusted OR 2 (95% CI) <sup>a</sup> | 1       | 0.98 (0.79-1.20) | 0.91 (0.74-1.14) | 0.80 (0.64-1.01) | 0.053                |
| <b>Capric acid (C10:0)</b>          |         |                  |                  |                  |                      |
| Cases/Controls                      | 450/418 | 465/419          | 418/419          | 328/418          |                      |
| Crude OR (95% CI)                   | 1       | 1.03 (0.85-1.24) | 0.93 (0.77-1.12) | 0.73 (0.60-0.89) | 0.001                |
| Adjusted OR 2 (95% CI) <sup>a</sup> | 1       | 1.04 (0.84-1.28) | 0.96 (0.77-1.20) | 0.71 (0.56-0.90) | 0.004                |
| <b>Undecanoic acid (C11:0)</b>      |         |                  |                  |                  |                      |
| Cases/Controls                      | 489/419 | 454/424          | 364/413          | 354/418          |                      |
| Crude OR (95% CI)                   | 1       | 0.92 (0.76-1.10) | 0.76 (0.62-0.92) | 0.73 (0.60-0.88) | <0.001               |
| Adjusted OR 2 (95% CI) <sup>a</sup> | 1       | 0.98 (0.80-1.21) | 0.79 (0.64-0.97) | 0.78 (0.62-0.97) | 0.005                |
| <b>Lauric acid (C12:0)</b>          |         |                  |                  |                  |                      |
| Cases/Controls                      | 418/418 | 445/419          | 424/419          | 374/418          |                      |
| Crude OR (95% CI)                   | 1       | 1.06 (0.88-1.28) | 1.01 (0.84-1.23) | 0.89 (0.74-1.09) | 0.230                |
| Adjusted OR 2 (95% CI) <sup>a</sup> | 1       | 0.99 (0.80-1.23) | 0.96 (0.77-1.20) | 0.82 (0.65-1.05) | 0.112                |
| <b>Tridecanoic acid (C13:0)</b>     |         |                  |                  |                  |                      |
| Cases/Controls                      | 523/418 | 438/419          | 373/419          | 327/418          |                      |
| Crude OR (95% CI)                   | 1       | 0.84 (0.69-1.01) | 0.71 (0.59-0.86) | 0.63 (0.52-0.76) | <0.001               |
| Adjusted OR 2 (95% CI) <sup>a</sup> | 1       | 0.86 (0.70-1.05) | 0.74 (0.60-0.92) | 0.62 (0.49-0.77) | <0.001               |
| <b>Myristic acid (C14:0)</b>        |         |                  |                  |                  |                      |
| Cases/Controls                      | 469/418 | 406/419          | 449/419          | 337/418          |                      |
| Crude OR (95% CI)                   | 1       | 0.86 (0.71-1.04) | 0.96 (0.79-1.15) | 0.72 (0.59-0.87) | 0.006                |
| Adjusted OR 2 (95% CI) <sup>a</sup> | 1       | 0.82 (0.65-1.05) | 0.82 (0.63-1.07) | 0.60 (0.45-0.79) | 0.001                |
| <b>Pentadecanoic acid (C15:0)</b>   |         |                  |                  |                  |                      |
| Cases/Controls                      | 508/418 | 484/419          | 347/419          | 332/418          |                      |
| Crude OR (95% CI)                   | 1       | 0.95 (0.79-1.14) | 0.68 (0.56-0.83) | 0.63 (0.52-0.77) | <0.001               |
| Adjusted OR 2 (95% CI) <sup>a</sup> | 1       | 0.95 (0.77-1.16) | 0.67 (0.54-0.84) | 0.59 (0.47-0.75) | <0.001               |
| <b>Palmitic acid (C16:0)</b>        |         |                  |                  |                  |                      |
| Cases/Controls                      | 457/418 | 382/419          | 397/419          | 425/418          |                      |
| Crude OR (95% CI)                   | 1       | 0.83 (0.69-1.01) | 0.87 (0.72-1.05) | 0.93 (0.77-1.12) | 0.534                |
| Adjusted OR 2 (95% CI) <sup>a</sup> | 1       | 0.59 (0.42-0.83) | 0.57 (0.38-0.88) | 0.57 (0.34-0.96) | 0.062                |
| <b>Heptadecanoic acid (C17:0)</b>   |         |                  |                  |                  |                      |
| Cases/Controls                      | 457/418 | 414/419          | 400/419          | 390/418          |                      |
| Crude OR (95% CI)                   | 1       | 0.90 (0.75-1.09) | 0.87 (0.72-1.06) | 0.85 (0.70-1.03) | 0.096                |
| Adjusted OR 2 (95% CI) <sup>a</sup> | 1       | 0.91 (0.74-1.13) | 0.82 (0.66-1.03) | 0.88 (0.69-1.12) | 0.211                |
| <b>Stearic acid (C18:0)</b>         |         |                  |                  |                  |                      |

Supplemental Information

|                                     |         |                  |                  |                  |        |
|-------------------------------------|---------|------------------|------------------|------------------|--------|
| Cases/Controls                      | 426/418 | 398/419          | 404/419          | 433/418          |        |
| Crude OR (95% CI)                   | 1       | 0.93 (0.77-1.13) | 0.95 (0.78-1.15) | 1.02 (0.84-1.23) | 0.835  |
| Adjusted OR 2 (95% CI) <sup>a</sup> | 1       | 0.97 (0.70-1.33) | 1.04 (0.69-1.57) | 1.05 (0.64-1.74) | 0.778  |
| Nonadecanoic acid (C19:0)           |         |                  |                  |                  |        |
| Cases/Controls                      | 510/418 | 417/419          | 365/419          | 369/418          |        |
| Crude OR (95% CI)                   | 1       | 0.82 (0.68-0.98) | 0.71 (0.59-0.86) | 0.72 (0.60-0.88) | <0.001 |
| Adjusted OR 2 (95% CI) <sup>a</sup> | 1       | 0.83 (0.67-1.03) | 0.72 (0.57-0.90) | 0.64 (0.50-0.82) | <0.001 |
| Arachidic acid (C20:0)              |         |                  |                  |                  |        |
| Cases/Controls                      | 459/418 | 394/419          | 374/419          | 434/418          |        |
| Crude OR (95% CI)                   | 1       | 0.86 (0.71-1.04) | 0.81 (0.67-0.99) | 0.95 (0.78-1.14) | 0.467  |
| Adjusted OR 2 (95% CI) <sup>a</sup> | 1       | 0.81 (0.64-1.03) | 0.74 (0.56-0.96) | 0.85 (0.62-1.17) | 0.219  |
| Behenic acid (C22:0)                |         |                  |                  |                  |        |
| Cases/Controls                      | 531/418 | 400/419          | 392/419          | 338/418          |        |
| Crude OR (95% CI)                   | 1       | 0.75 (0.62-0.91) | 0.74 (0.61-0.89) | 0.64 (0.53-0.77) | <0.001 |
| Adjusted OR 2 (95% CI) <sup>a</sup> | 1       | 0.71 (0.57-0.89) | 0.65 (0.51-0.83) | 0.48 (0.36-0.65) | <0.001 |

<sup>a</sup> Adjusted for BMI, MET, age of menarche, number of live births, educational level, income, passive smoker, regular drinker, breastfeeding history, ever used oral contraceptives, family history of breast cancer in first-degree relatives, history of benign breast diseases, dietary intakes of monounsaturated fatty acid and polyunsaturated fatty acid which were adjusted for total energy using the residual method.

<sup>b</sup> Linear trends for ORs were performed by entering categorical variables as continuous variables.
